# Supplementary material for: Chemical composition of secondary organic aerosol particles formed from mixtures of anthropogenic and biogenic precursors
Source: Copernicus journal article supplement (doi:10.5194/acp-22-9799-2022), 2022-08-02
Supplement: Supplementary file 1 [file acp-22-9799-2022-supplement.pdf]

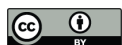

*Supplement of*

## **Chemical composition of secondary organic aerosol particles formed from mixtures of anthropogenic and biogenic precursors**

**Yunqi Shao et al.**

*Correspondence to:* Yunqi Shao ([yunqi.shao@manchester.ac.uk](mailto:yunqi.shao@manchester.ac.uk))

The copyright of individual parts of the supplement might differ from the article licence.

## Section 1: Supplementary figures

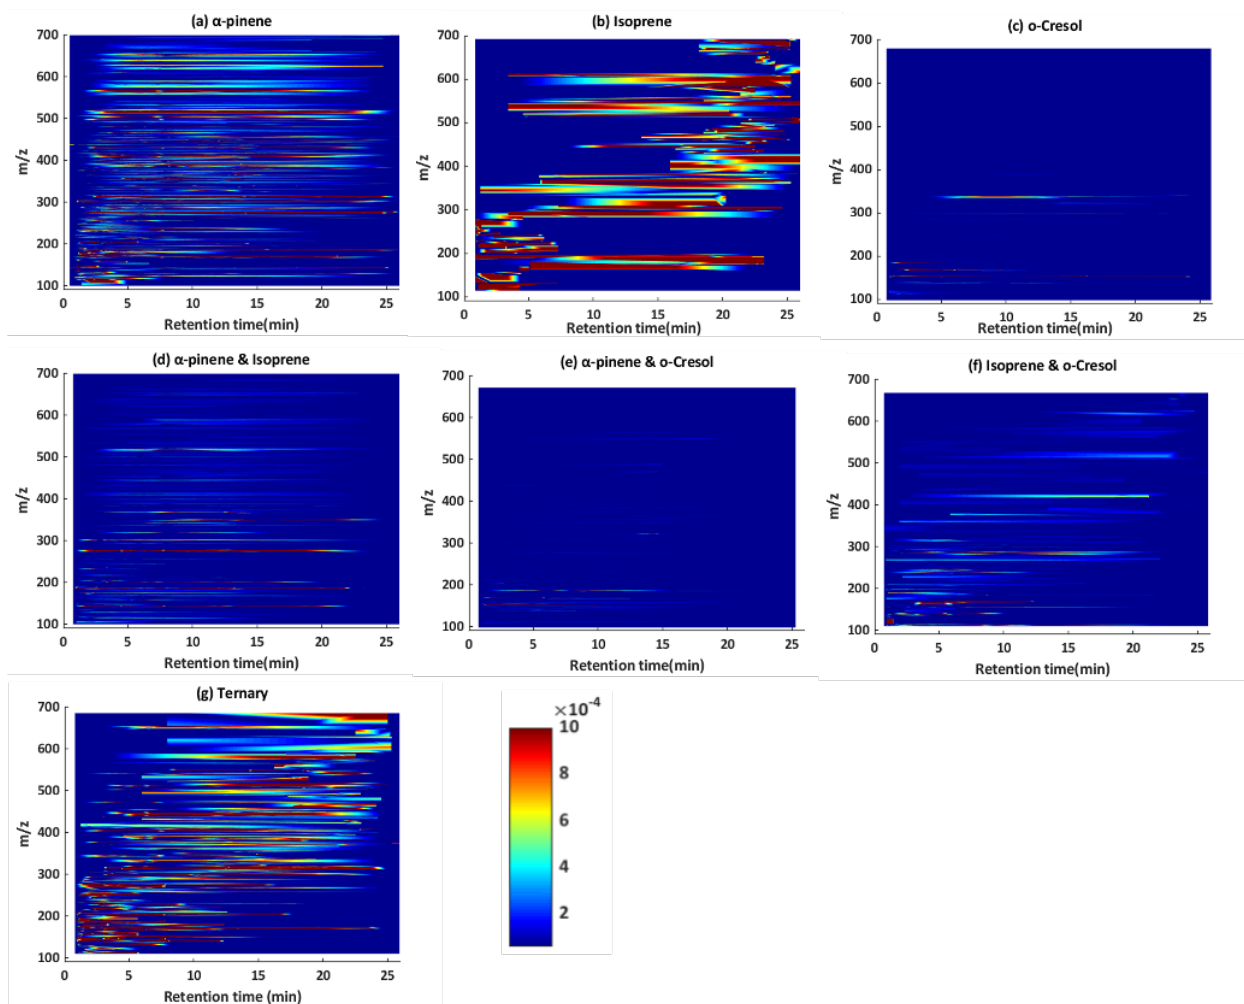

Figure S1: General Mass spectra  $m/z$  vs retention time with normalized signal intensity as colour) for compounds detected in Negative ionization mode for single and mixture experiment.

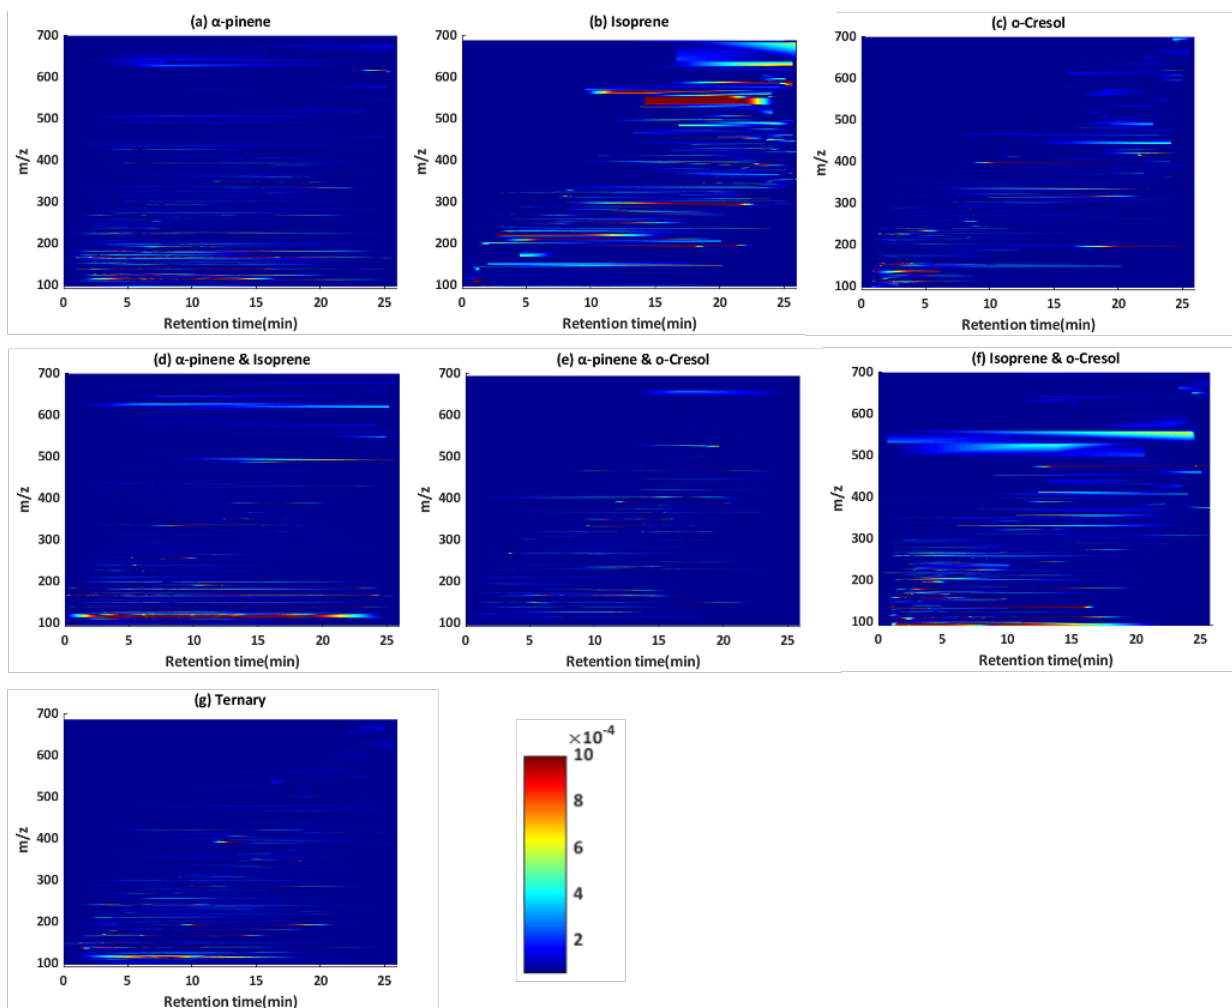

Figure S2: General Mass spectra  $m/z$  vs retention time with normalized signal intensity as colour) for compounds detected in Positive ionization mode for single and mixture experiment

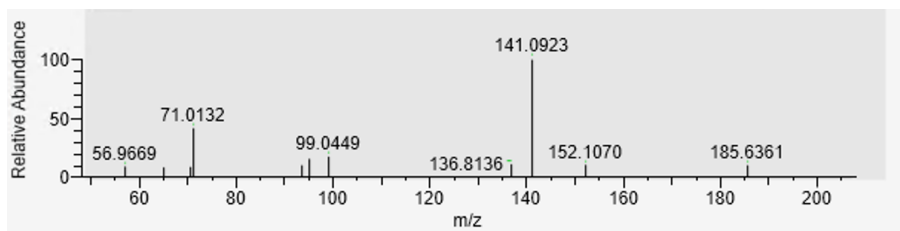

Figure S3: The fragmentation spectra for C<sub>9</sub>H<sub>14</sub>O<sub>4</sub> in binary  $\alpha$ -pinene/isoprene system.

## Section 2: Supplementary Tables

The product ions of deprotonated species of  $C_7H_7NO_4$  and  $C_7H_7NO_3$  in single o-cresol system, binary  $\alpha$ -pinene/o-cresol and Isoprene/o-cresol system will be discussed here in order to illustrate the methodology to assign SOA compound structure. For all of the  $C_7H_7NO_4$  isomer, the fragment ion at  $m/z$  138 due to neutral loss of NO group by odd electron cleavage that often happen in ring structures with nitrogen containing group (Hayen et al., 2002; Fu et al., 2006; Pereira et al., 2015).  $C_7H_7NO_4$  (i) and (III) also has the combine loss of NO and hydrogen radical ( $m/z=137$ ), while the 109  $m/z$  fragment corresponding to the combined loss of NO and CO from the deprotonated  $C_7H_7NO_4$ . For the  $C_7H_7NO_3$  compound, the fragment ion  $m/z=122$  has formed as a result of loss of NO from  $m/z$  152, the loss of combined NO and hydrogen radicals resulting forming the 121 $m/z$  fragment and the combined loss of CH and NO leading to formation of 109  $m/z$  fragment. These fragmentation ions of deprotonated molecules suggested that the  $C_7H_7NO_4$  are the methyl-nitrocatechol and the  $C_7H_7NO_3$  is methyl-nitrophenol(Kitanovski et al., 2012).

Table S1: Deprotonated molecular species for C<sub>7</sub>H<sub>7</sub>NO<sub>4</sub> isomers and C<sub>7</sub>H<sub>7</sub>NO<sub>3</sub>, obtained from the use of the Orbitrap<sub>LCMS</sub> in binary  $\alpha$ -pinene/*o*-cresol and Isoprene/*o*-cresol system respectively.

| Precursors System                  | Formula                                             | Retention Time (min) | [M-H] <sup>-</sup> | Fragment ion [m/z] | Loss [Da]                                    | Suspected Fragment ion MF                     |
|------------------------------------|-----------------------------------------------------|----------------------|--------------------|--------------------|----------------------------------------------|-----------------------------------------------|
| <i>o</i> -cresol                   | C <sub>7</sub> H <sub>7</sub> NO <sub>4</sub> (i)   | 4.46                 | 168                | 166                | 2                                            | C <sub>7</sub> H <sub>5</sub> NO <sub>4</sub> |
|                                    |                                                     |                      |                    | 138                | 30                                           | C <sub>7</sub> H <sub>6</sub> O <sub>3</sub>  |
|                                    |                                                     |                      |                    | 122                | 46                                           | C <sub>7</sub> H <sub>6</sub> O <sub>2</sub>  |
|                                    |                                                     |                      |                    | 108                | 60                                           | C <sub>6</sub> H <sub>4</sub> O <sub>2</sub>  |
|                                    | C <sub>7</sub> H <sub>7</sub> NO <sub>4</sub> (ii)  | 7.40                 | 168                | 138                | 30                                           | C <sub>7</sub> H <sub>6</sub> O <sub>3</sub>  |
|                                    |                                                     |                      |                    | 137                | 31                                           | C <sub>7</sub> H <sub>5</sub> O <sub>3</sub>  |
|                                    |                                                     |                      |                    | 122                | 46                                           | C <sub>7</sub> H <sub>6</sub> O <sub>2</sub>  |
|                                    |                                                     |                      |                    | 109                | 59                                           | C <sub>6</sub> H <sub>5</sub> O <sub>2</sub>  |
|                                    | C <sub>7</sub> H <sub>7</sub> NO <sub>4</sub> (iii) | 8.93                 | 168                | 138                | 30                                           | C <sub>7</sub> H <sub>6</sub> O <sub>3</sub>  |
| 137                                |                                                     |                      |                    | 31                 | C <sub>7</sub> H <sub>5</sub> O <sub>3</sub> |                                               |
| 109                                |                                                     |                      |                    | 59                 | C <sub>6</sub> H <sub>5</sub> O <sub>2</sub> |                                               |
| $\alpha$ -pinene/ <i>o</i> -cresol | C <sub>7</sub> H <sub>7</sub> NO <sub>4</sub> (i)   | 4.52                 | 168                | 166                | 2                                            | C <sub>7</sub> H <sub>5</sub> NO <sub>4</sub> |
|                                    |                                                     |                      |                    | 138                | 30                                           | C <sub>7</sub> H <sub>6</sub> O <sub>3</sub>  |
|                                    |                                                     |                      |                    | 108                | 60                                           | C <sub>6</sub> H <sub>4</sub> O <sub>2</sub>  |
|                                    | C <sub>7</sub> H <sub>7</sub> NO <sub>4</sub> (ii)  | 7.53                 | 168                | 138                | 30                                           | C <sub>7</sub> H <sub>6</sub> O <sub>3</sub>  |
|                                    |                                                     |                      |                    | 137                | 31                                           | C <sub>7</sub> H <sub>5</sub> O <sub>3</sub>  |
|                                    |                                                     |                      |                    | 109                | 59                                           | C <sub>6</sub> H <sub>5</sub> O <sub>2</sub>  |
|                                    | C <sub>7</sub> H <sub>7</sub> NO <sub>4</sub> (iii) | 9.08                 | 168                | 138                | 30                                           | C <sub>7</sub> H <sub>6</sub> O <sub>3</sub>  |
|                                    |                                                     |                      |                    | 137                | 31                                           | C <sub>7</sub> H <sub>5</sub> O <sub>3</sub>  |
|                                    |                                                     |                      |                    | 109                | 59                                           | C <sub>6</sub> H <sub>5</sub> O <sub>2</sub>  |
|                                    | C <sub>7</sub> H <sub>7</sub> NO <sub>3</sub>       | 10.19                | 152                | 122                | 30                                           | C <sub>7</sub> H <sub>6</sub> O <sub>2</sub>  |
|                                    |                                                     |                      |                    | 121                | 31                                           | C <sub>7</sub> H <sub>5</sub> O <sub>2</sub>  |
|                                    |                                                     |                      |                    | 109                | 43                                           | C <sub>6</sub> H <sub>5</sub> O <sub>2</sub>  |
| Isoprene/ <i>o</i> -cresol         | C <sub>7</sub> H <sub>7</sub> NO <sub>4</sub> (i)   | 4.52                 | 168                | 166                | 2                                            | C <sub>7</sub> H <sub>5</sub> NO <sub>4</sub> |
|                                    |                                                     |                      |                    | 138                | 30                                           | C <sub>7</sub> H <sub>6</sub> O <sub>3</sub>  |
|                                    |                                                     |                      |                    | 137                | 31                                           | C <sub>7</sub> H <sub>5</sub> O <sub>3</sub>  |
|                                    |                                                     |                      |                    | 108                | 60                                           | C <sub>6</sub> H <sub>4</sub> O <sub>2</sub>  |
|                                    | C <sub>7</sub> H <sub>7</sub> NO <sub>4</sub> (ii)  | 7.53                 | 168                | 138                | 30                                           | C <sub>7</sub> H <sub>6</sub> O <sub>3</sub>  |
|                                    |                                                     |                      |                    | 137                | 31                                           | C <sub>7</sub> H <sub>5</sub> O <sub>3</sub>  |
|                                    |                                                     |                      |                    | 109                | 59                                           | C <sub>6</sub> H <sub>5</sub> O <sub>2</sub>  |
|                                    | C <sub>7</sub> H <sub>7</sub> NO <sub>4</sub> (iii) | 9.14                 | 168                | 138                | 30                                           | C <sub>7</sub> H <sub>6</sub> O <sub>3</sub>  |
|                                    |                                                     |                      |                    | 137                | 31                                           | C <sub>7</sub> H <sub>5</sub> O <sub>3</sub>  |
|                                    |                                                     |                      |                    | 109                | 59                                           | C <sub>6</sub> H <sub>5</sub> O <sub>2</sub>  |
|                                    | C <sub>7</sub> H <sub>7</sub> NO <sub>3</sub>       | 10.20                | 152                | 122                | 30                                           | C <sub>7</sub> H <sub>6</sub> O <sub>2</sub>  |
|                                    |                                                     |                      |                    | 121                | 31                                           | C <sub>7</sub> H <sub>5</sub> O <sub>2</sub>  |
| 109                                |                                                     |                      |                    | 43                 | C <sub>6</sub> H <sub>5</sub> O <sub>2</sub> |                                               |

Table S2: The total normalized peak area and normalized mass concentration attributed to nC>21 molecules that were found in all repeat experiments in selected system. The normalized peak area of nC>21 molecules obtained from the both ionization mode in orbitrap-LCMS, and the particulate mass concentration of each system obtained from HR-TOF-AMS measurement. The normalized mass concentration equals the particulate mass concentration multiply the normalized peak area of nC>21 molecules.

|                                               | Particulate mass concentration at the end of experiment(ug/m <sup>3</sup> ) | Negative ionization mode                 |                                                                       | Positive ionization mode                 |                                                                       |
|-----------------------------------------------|-----------------------------------------------------------------------------|------------------------------------------|-----------------------------------------------------------------------|------------------------------------------|-----------------------------------------------------------------------|
|                                               |                                                                             | Normalized Peak Area of nC >21 molecules | Normalized mass concentration of nC >21 molecules(ug/m <sup>3</sup> ) | Normalized Peak Area of nC >21 molecules | Normalized mass concentration of nC >21 molecules(ug/m <sup>3</sup> ) |
| <b>a) <math>\alpha</math>-pinene</b>          | 361                                                                         | 0.008                                    | 3.01                                                                  | 0.003                                    | 1.34                                                                  |
| <b>b) Isoprene</b>                            | 0.4                                                                         | 0.007                                    | 0.002                                                                 | 0.040                                    | 0.016                                                                 |
| <b>d) <math>\alpha</math>-pinene/isoprene</b> | 102                                                                         | 0.011                                    | 1.15                                                                  | 0.002                                    | 0.24                                                                  |
| <b>e) <math>\alpha</math>-pinene/o-cresol</b> | 150                                                                         | 0.004                                    | 0.73                                                                  | 0.019                                    | 2.85                                                                  |
| <b>f) Isoprene/o-cresol</b>                   | 22                                                                          | 0.0006                                   | 0.013                                                                 | 0.006                                    | 0.14                                                                  |
| <b>g) Ternary</b>                             | 85                                                                          | 0.002                                    | 0.16                                                                  | 0.012                                    | 1.10                                                                  |

Reference:

Fu, X., Zhang, Y., Shi, S., Gao, F., Wen, D., Li, W., Liao, Y., and Liu, H.: Fragmentation study of hexanitrostilbene by ion trap multiple mass spectrometry and analysis by liquid chromatography/mass spectrometry, *Rapid Communications in Mass Spectrometry*, 20, 2906-2914, <https://doi.org/10.1002/rcm.2683>, 2006.

Hayen, H., Jachmann, N., Vogel, M., and Karst, U.: LC-Electron capture APCI-MS for the determination of nitroaromatic compounds, *The Analyst*, 127, 1027-1030, 10.1039/B205477A, 2002.

Kitanovski, Z., Grgić, I., Yasmeeen, F., Claeys, M., and Čusak, A.: Development of a liquid chromatographic method based on ultraviolet-visible and electrospray ionization mass spectrometric detection for the identification of nitrocatechols and related tracers in biomass burning atmospheric organic aerosol, *Rapid Communications in Mass Spectrometry*, 26, 793-804, <https://doi.org/10.1002/rcm.6170>, 2012.

Pereira, K. L., Hamilton, J. F., Rickard, A. R., Bloss, W. J., Alam, M. S., Camredon, M., Ward, M. W., Wyche, K. P., Muñoz, A., Vera, T., Vázquez, M., Borrás, E., and Ródenas, M.: Insights into the Formation and Evolution of Individual Compounds in the Particulate Phase during Aromatic Photo-Oxidation, *Environmental Science & Technology*, 49, 13168-13178, 10.1021/acs.est.5b03377, 2015.
